# Supplementary material for: Pt1−xNix Alloy Nanoparticles Embedded in Self-Grown Carbon Nanofibers: Synthesis, Properties and Catalytic Activity in HER
Source: MDPI journal article supplement (doi:10.3390/catal13030599), 2023-03-16
Supplement: s1 [file s1]

Supplementary Information

# Pt<sub>1-x</sub>Ni<sub>x</sub> Alloy Nanoparticles Embedded in Self-Grown Carbon Nanofibers: Synthesis, Properties and Catalytic Activity in HER

Anton A. Popov <sup>1</sup>, Sofya D. Afonnikova <sup>2</sup>, Andrey D. Varygin <sup>1,3</sup>, Yury I. Bauman <sup>2</sup>, Mikhail V. Trenikhin <sup>4</sup>, Pavel E. Plyusnin <sup>1</sup>, Yury V. Shubin <sup>1</sup>, Aleksey A. Vedyagin <sup>2</sup> and Ilya V. Mishakov <sup>2,\*</sup>

<sup>1</sup> Nikolaev Institute of Inorganic Chemistry SB RAS, 3 Lavrentyev Ave., 630090 Novosibirsk, Russia

<sup>2</sup> Borekov Institute of Catalysis SB RAS, 5 Lavrentyev Ave., 630090 Novosibirsk, Russia

<sup>3</sup> Department of Natural Science, Novosibirsk State University, 1 Pirogova str., 630090 Novosibirsk, Russia

<sup>4</sup> Department of Chemistry and Chemical Technology, Omsk State Technical University, 11 Mira Ave., 644050 Omsk, Russia

\* Correspondence: mishakov@catalysis.ru

**Table S1.** Carbon-based Pt-Ni composites used for electrochemical applications.

| # | Catalyst                               | Preparation method                                                                                                | Reference |
|---|----------------------------------------|-------------------------------------------------------------------------------------------------------------------|-----------|
| 1 | Ni@Pt+C                                | Ni@Pt core-shell nanoparticles mixed with carbon black powder                                                     | [1]       |
| 2 | Ni-Pt/C                                | Ni-Pt truncated octahedrons, Ni-Pt nanomultipods, and Ni-Pt nanoflowers were grown on the glassy carbon substrate | [2]       |
| 3 | Ni@Pt/MWCNTs                           | Ni@Pt core-shell nanoparticles deposited on the surface of functionalized multi-walled carbon nanotubes           | [3]       |
| 4 | Pt-Ni/MWCNTs                           | Pt-Ni nanoparticles supported on multi-walled carbon nanotubes                                                    | [4]       |
| 5 | Ni/Pt/CNFs                             | Pt nanoparticles deposited onto the porous Ni/CNF nanofibers using a chemical reduction method                    | [5]       |
| 6 | Pt <sub>1-x</sub> Ni <sub>x</sub> /CNF | Pt <sub>1-x</sub> Ni <sub>x</sub> alloy nanoparticles embedded in self-grown carbon nanofibers                    | This work |

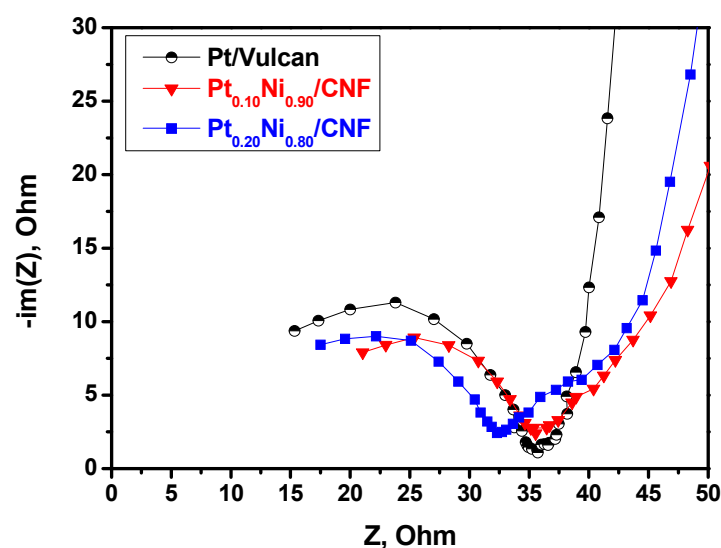

**Figure S1.** Electrochemical impedance spectroscopy analysis data (Nyquist plots) for the samples of Pt<sub>1-x</sub>Ni<sub>x</sub>/CNF composites.

## References

1. Chen, Y.; Yang, F.; Dai, Y.; Wang, W.; Chen, S. Ni@Pt Core-Shell Nanoparticles: Synthesis, Structural and Electrochemical Properties. *J. Phys. Chem. C* **2008**, *112*, 1645-1649, doi:10.1021/jp709886y.
2. Shan, A.; Huang, S.; Zhao, H.; Jiang, W.; Teng, X.; Huang, Y.; Chen, C.; Wang, R.; Lau, W.-M. Atomic-scaled surface engineering Ni-Pt nanoalloys towards enhanced catalytic efficiency for methanol oxidation reaction. *Nano Res.* **2020**, *13*, 3088-3097, doi:10.1007/s12274-020-2978-3.
3. Ali, S.; Khan, I.; Khan, S.A.; Sohail, M.; Ahmed, R.; Rehman, A.u.; Ansari, M.S.; Morsy, M.A. Electrocatalytic performance of Ni@Pt core-shell nanoparticles supported on carbon nanotubes for methanol oxidation reaction. *J. Electroanal. Chem.* **2017**, *795*, 17-25, doi:10.1016/j.jelechem.2017.04.040.
4. Rosado, G.; Verde, Y.; Valenzuela-Muñiz, A.M.; Barbosa, R.; Miki Yoshida, M.; Escobar, B. Catalytic activity of Pt-Ni nanoparticles supported on multi-walled carbon nanotubes for the oxygen reduction reaction. *Int. J. Hydrogen Energ.* **2016**, *41*, 23260-23271, doi:10.1016/j.ijhydene.2016.07.098.
5. Chen, J.; Niu, Q.; Chen, G.; Nie, J.; Ma, G. Electrooxidation of Methanol on Pt@Ni Bimetallic Catalyst Supported on Porous Carbon Nanofibers. *J. Phys. Chem. C* **2017**, *121*, 1463-1471, doi:10.1021/acs.jpcc.6b10882.
